# Supplementary material for: Study on the Photoluminescent and Thermal Properties of Zinc Complexes with a N6O4 Macrocyclic Ligand
Source: PubMed Central journal article supplement (PMC6100202; doi:10.3390/molecules23071735), 2018-07-16
Supplement: molecules-23-01735-s001.pdf [file molecules-23-01735-s001.pdf]

# Supplementary Materials

Article

## Study on Photoluminescent and Thermal Properties of Zinc Complexes with a N6O4 Macrocyclic Ligand

Xingyong Xue<sup>1,2</sup>, Qijun Wang<sup>1</sup>, Fusen Mai<sup>1</sup>, Xing Liang<sup>1</sup>, Yichen Huang<sup>1</sup>, Jiahe Li<sup>1</sup>,  
Yanling Zhou<sup>1</sup>, Dengfeng Yang<sup>3,\*</sup>, Zhen Ma<sup>1,4,\*</sup>

<sup>1</sup> School of Chemistry and Chemical Engineering, Guangxi University, Nanning 530004, P. R. China, E-mail: [mzmz2009@sohu.com](mailto:mzmz2009@sohu.com)

<sup>2</sup> Guangxi Colleges and Universities Key Laboratory of Applied Chemistry Technology and Resource Development

<sup>3</sup> Guangxi Academy of Sciences, Guangxi beibu gulf marine research center, Guangxi key laboratory of marine natural products and combinatorial biosynthesis chemistry, Nanning, Guangxi, P. R. China, E-mail: [yangdengfeng@gxas.cn](mailto:yangdengfeng@gxas.cn)

<sup>4</sup> Centro de Química Estrutural, Complexo I, Instituto Superior Técnico, Universidade de Lisboa, Av. Rovisco Pais, 1049-001, Lisbon, Portugal

\* Correspondence: [mzmz2009@sohu.com](mailto:mzmz2009@sohu.com); Tel.: +86-0771-323-3718

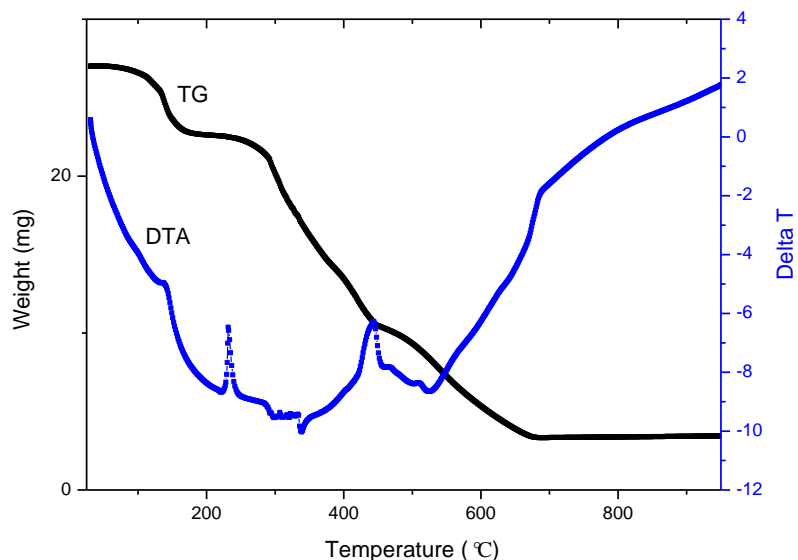

Figure S1. The TG-DTA curves of compound 3

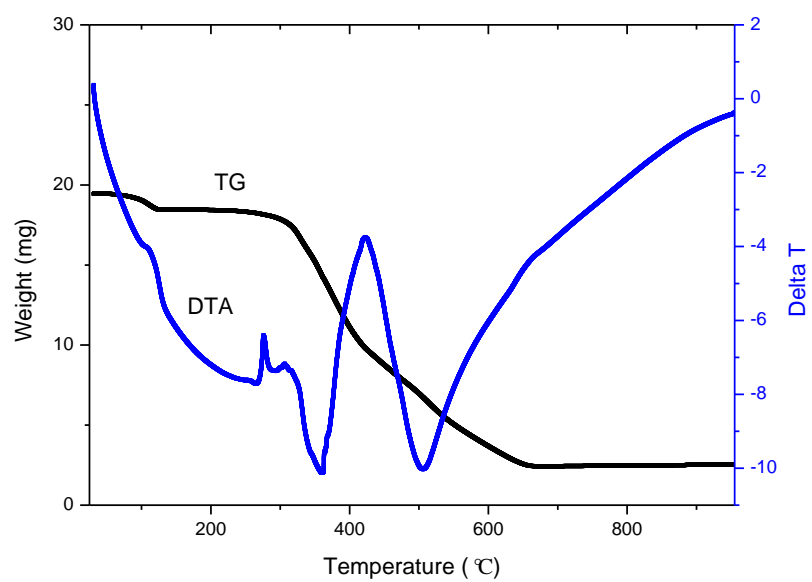

**Figure S2.** The TG-DTA curves of compound 4

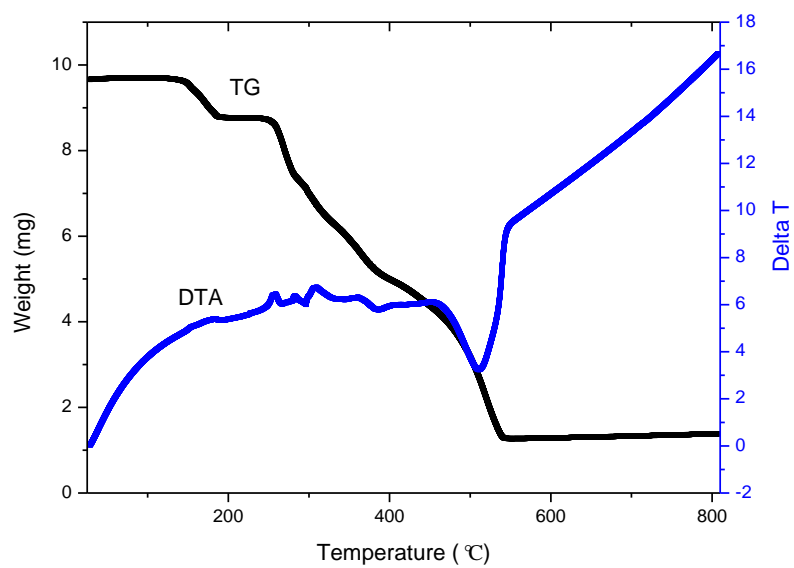

**Figure S3.** The TG-DTA curves of compound 5

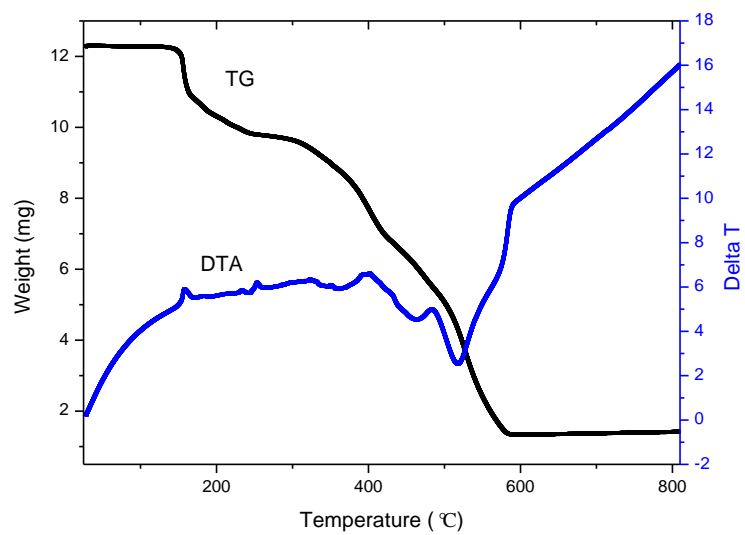

**Figure S4.** The TG-DTA curves of compound 6

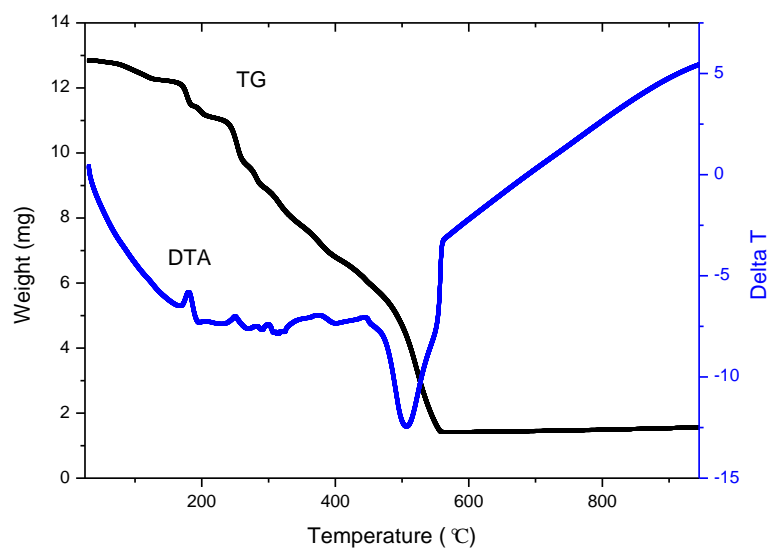

**Figure S5.** The TG-DTA curves of compound 7

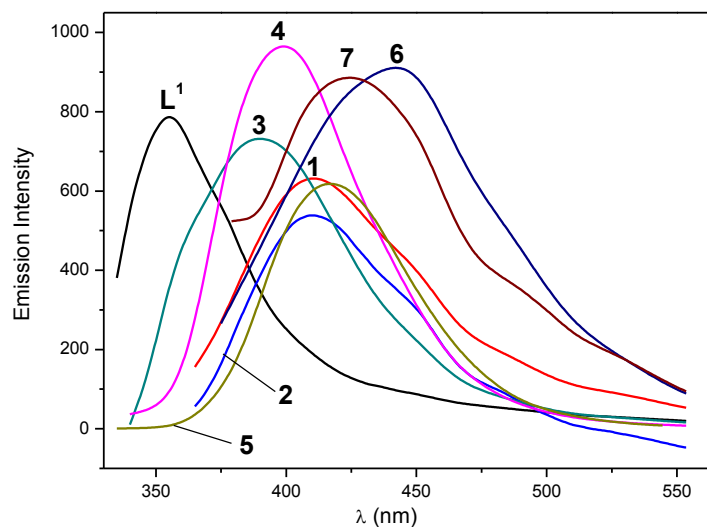

**Figure S6.** Photoluminescent properties of the L<sup>1</sup> and complexes 1-7 in DMF. The peak of emission is 356 nm for L<sup>1</sup>, 411 (1), 412 (2), 390 (3), 399 (4), 416(5), 446(6), 425(7), respectively.

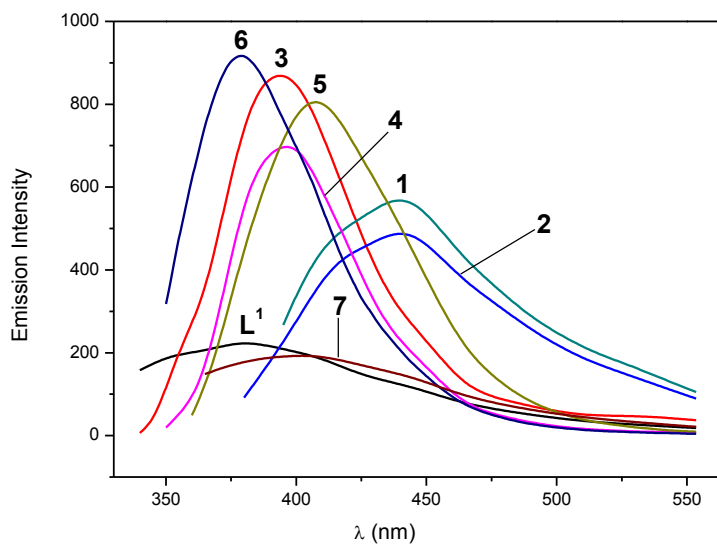

**Figure S7.** Photoluminescent properties of the L<sup>1</sup> and complexes 1-7 in DMSO. The peak of emission is 380 nm for L<sup>1</sup>, 440 (1), 4440 (2), 395 (3), 396 (4), 408(5), 379(6), 402(7), respectively.

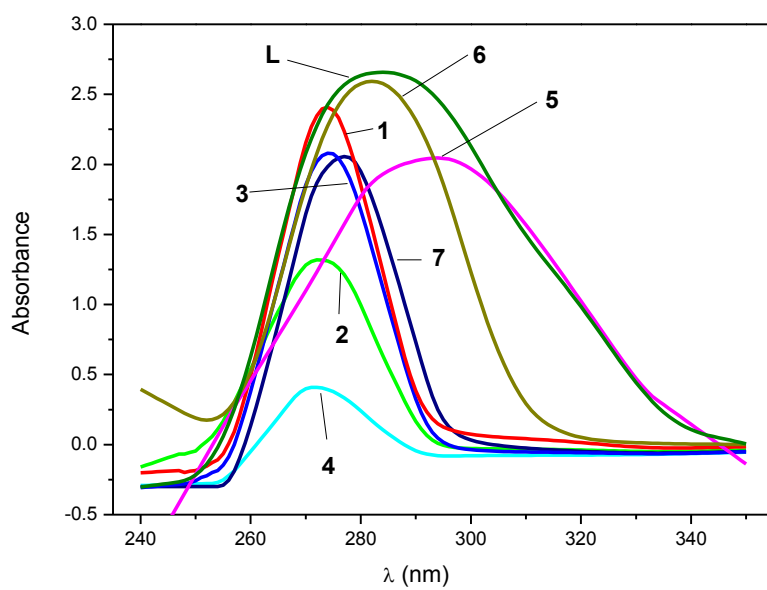

**Figure S8.** The UV-vis absorbance spectrum of the  $L^1$  and complexes 1-7 in DMF.

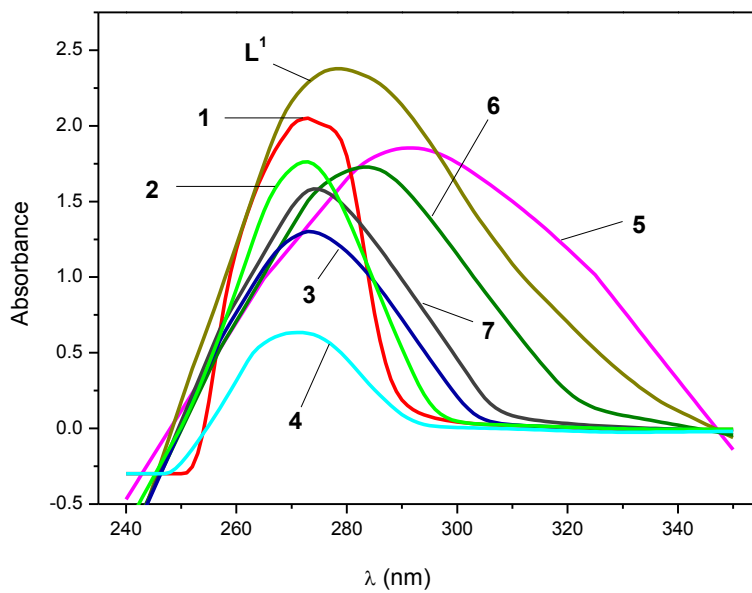

**Figure S9.** The UV-vis absorbance spectrum of the  $L^1$  and complexes 1-7 in DMSO.
